# Supplementary material
Source: Springer Nature journal article supplement (https://www.springermedizin.de/resource/supplementary/12974_2010_375_MOESM5_ESM.pdf/9601522)

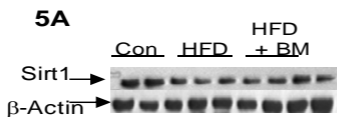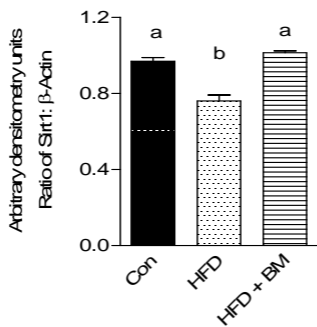

**5B**

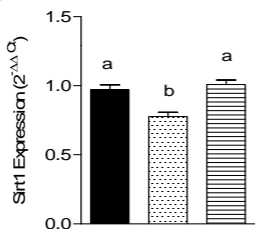

**5C**

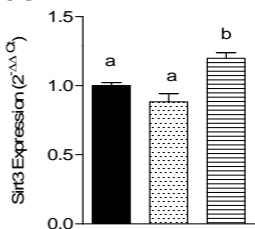

**5D**

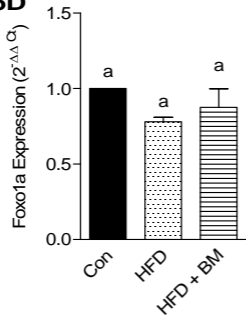

**5E**

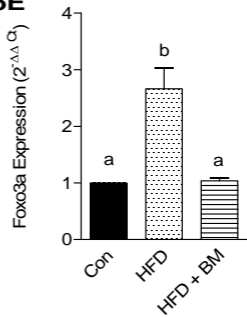

Supplement: MOESM5 [file 9601522]
